# Supplementary figures and images for: Bi-doped Co3O4 nanosheets for nitrate to ammonia with near 100% faradaic efficiency
Source: Royal Society of Chemistry journal article supplement (doi:10.1039/d5nj00143a), 2025-01-01

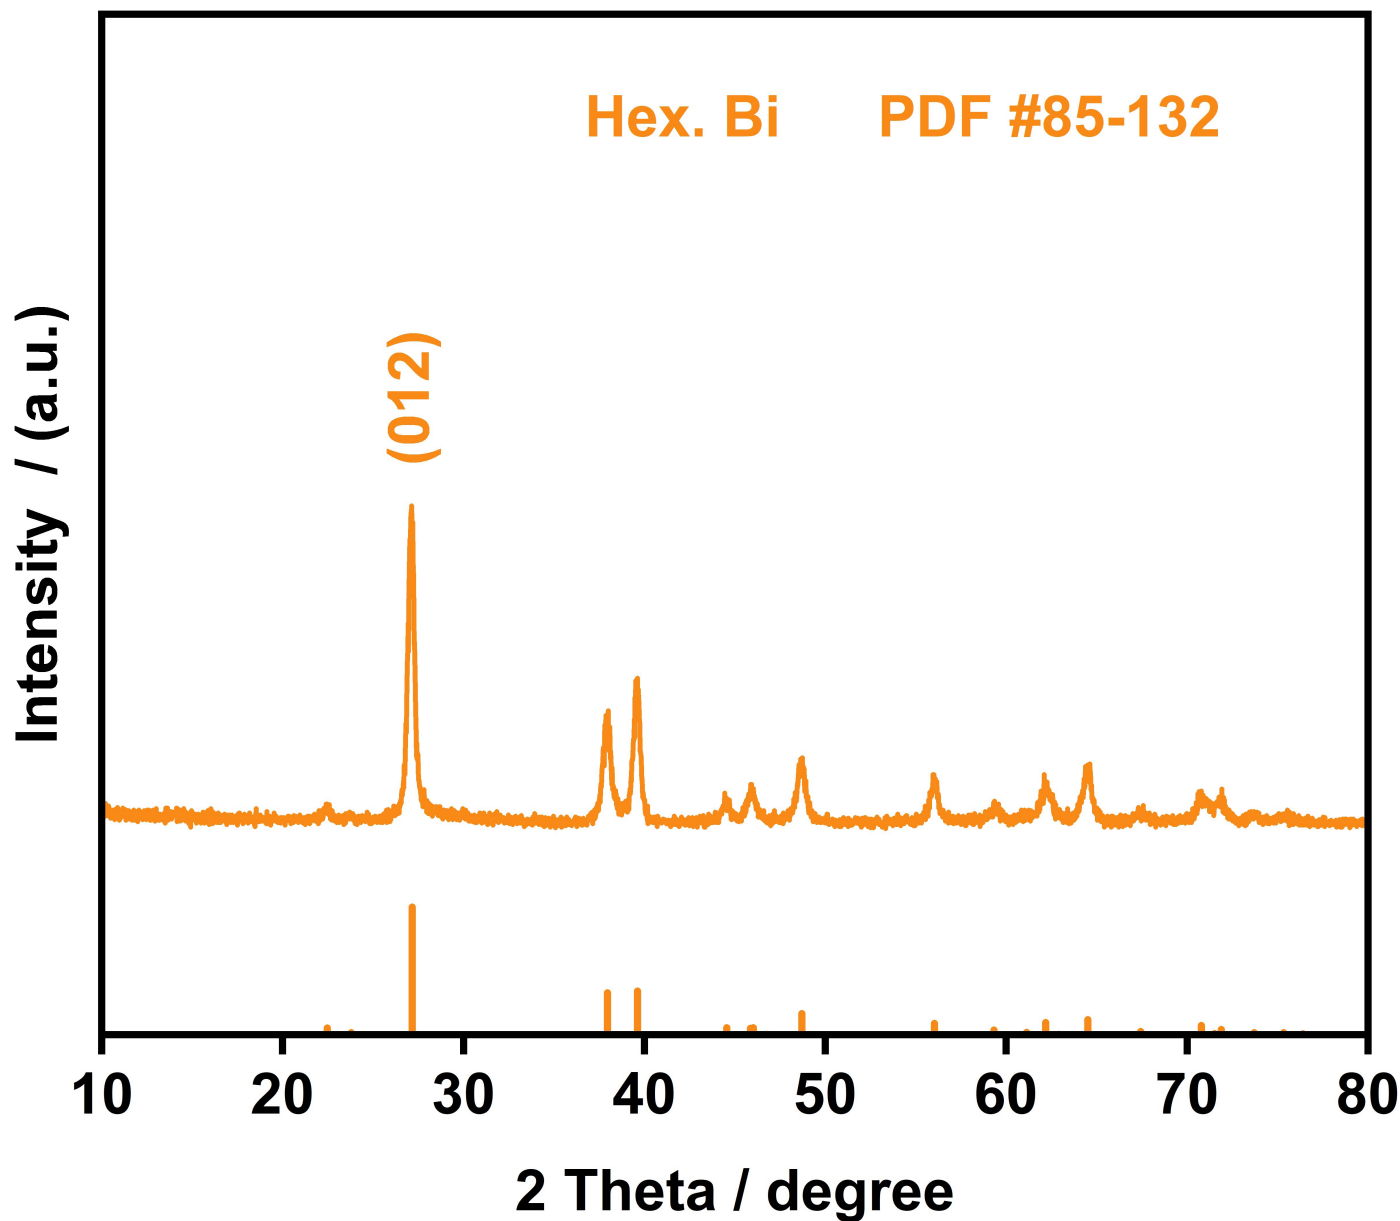

Supplement: d5nj00143a1.pdf [file d5nj00143a1.pdf]

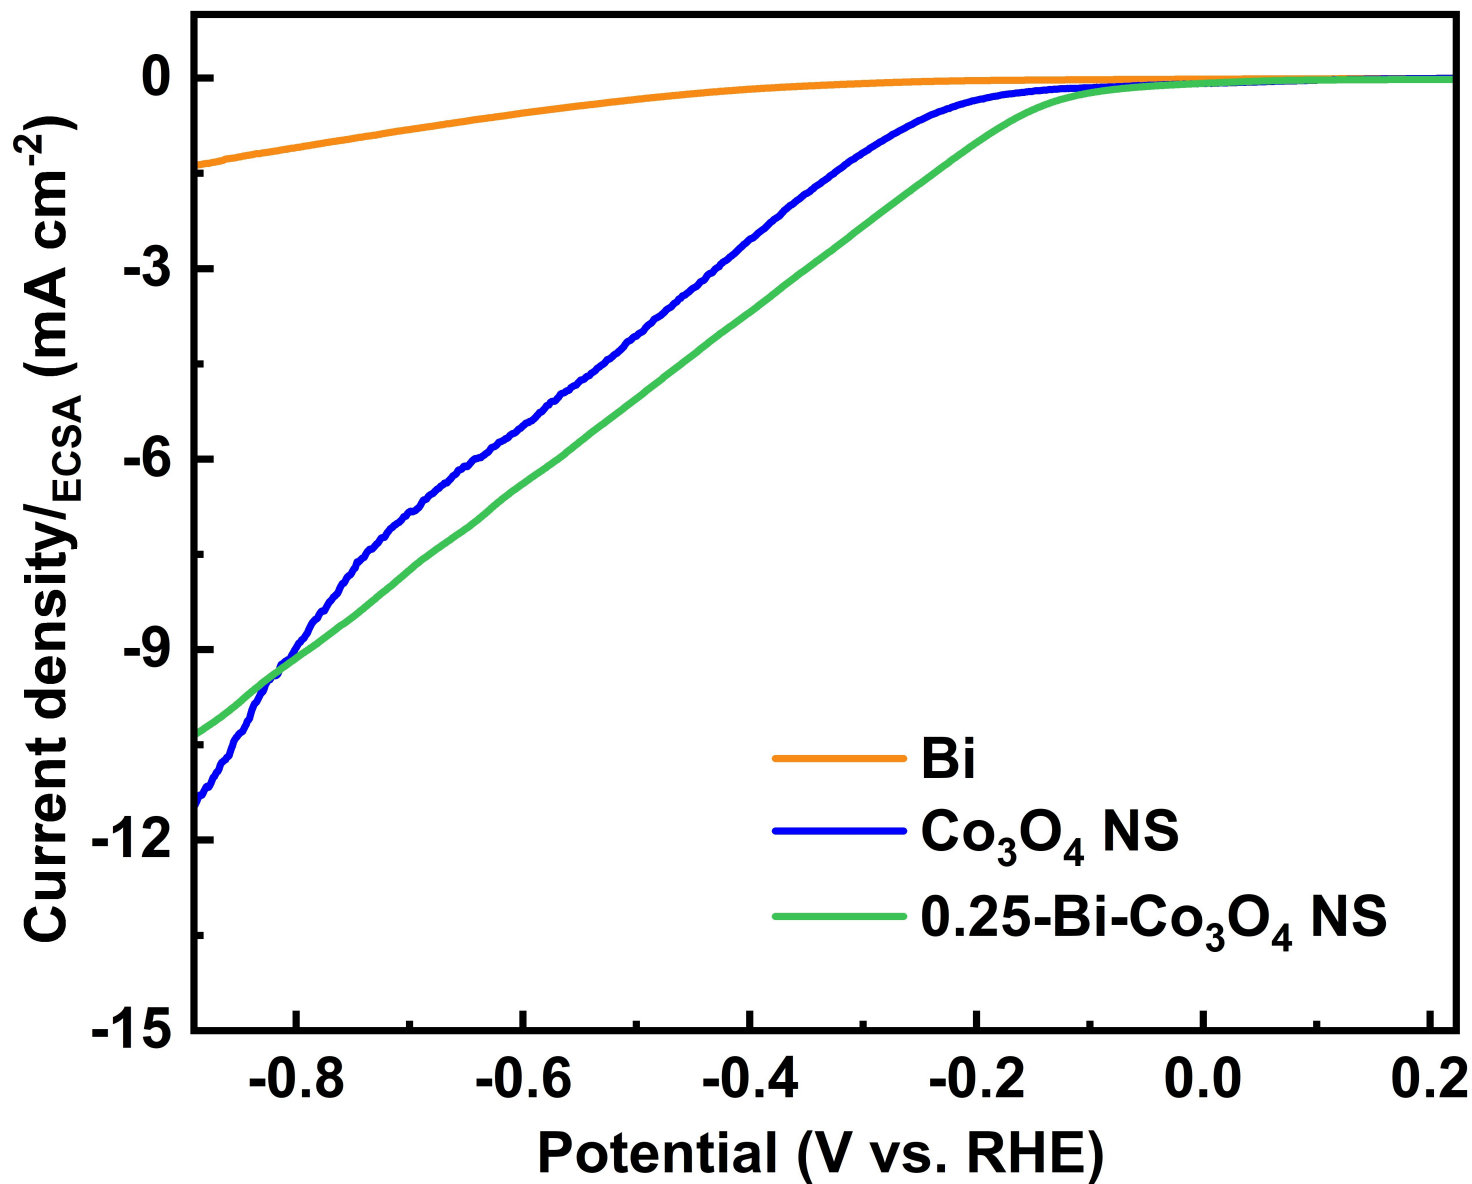

Supplement: d5nj00143a10.pdf [file d5nj00143a10.pdf]

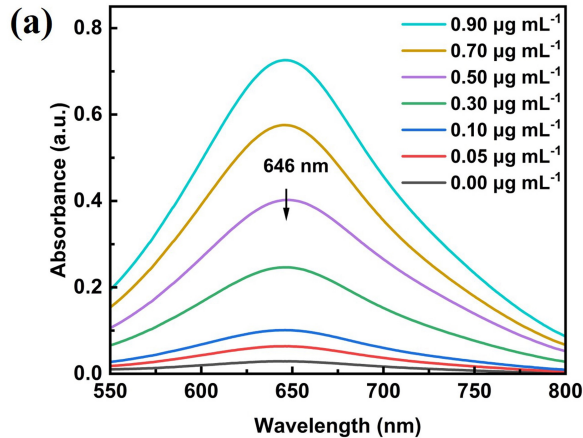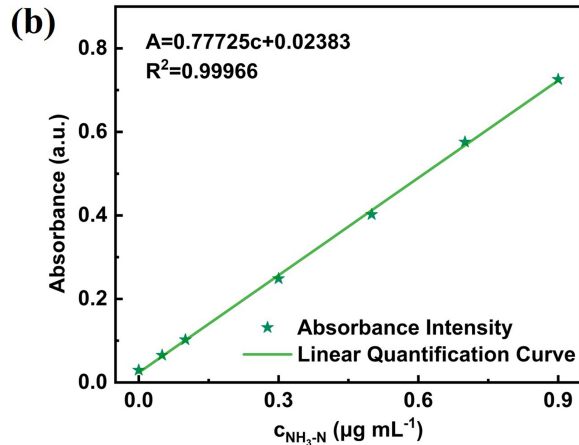

Supplement: d5nj00143a11.pdf [file d5nj00143a11.pdf]

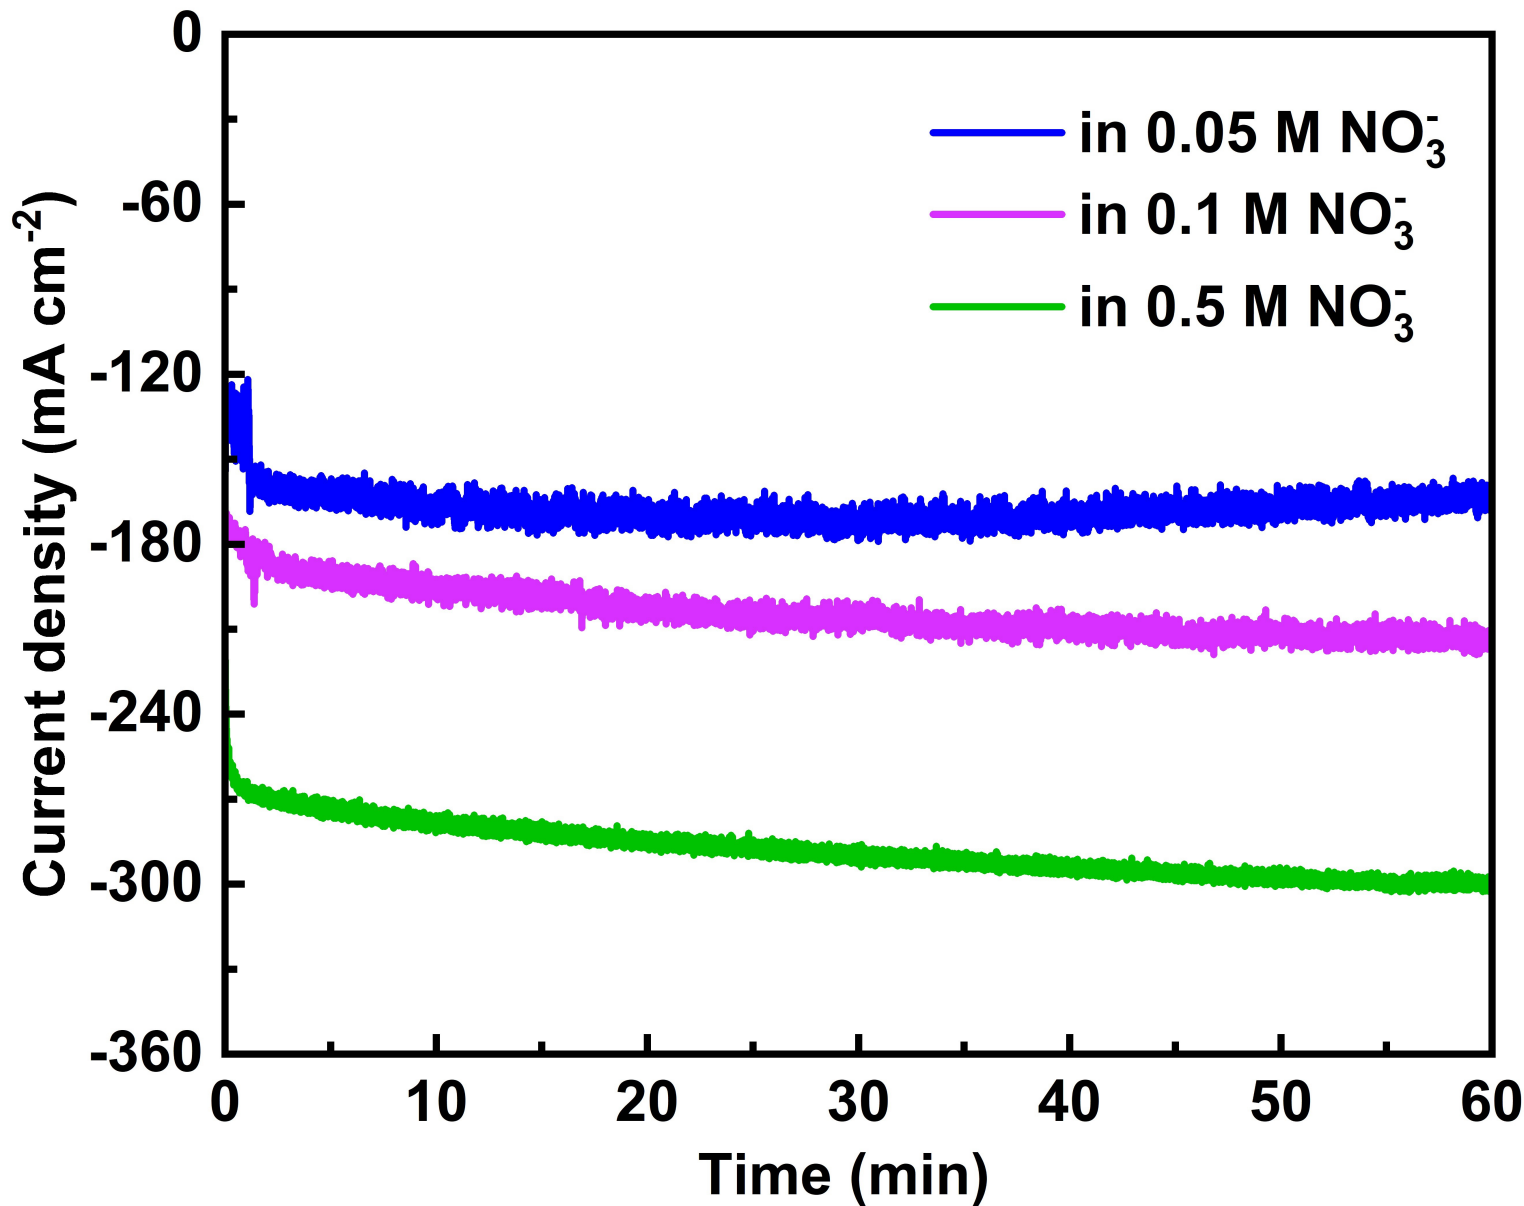

Supplement: d5nj00143a12.pdf [file d5nj00143a12.pdf]

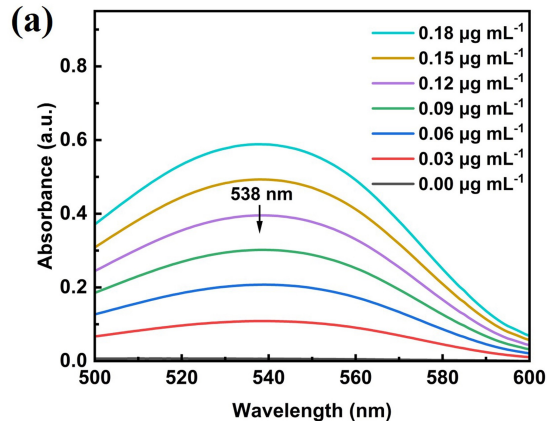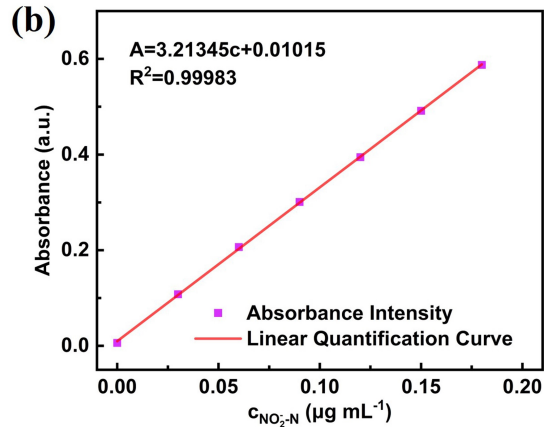

Supplement: d5nj00143a13.pdf [file d5nj00143a13.pdf]

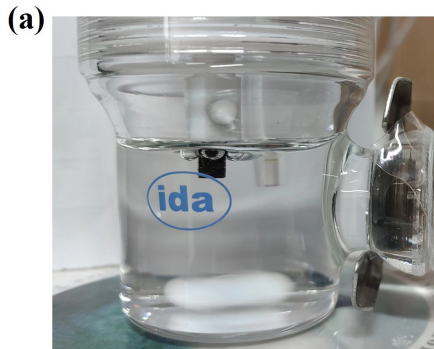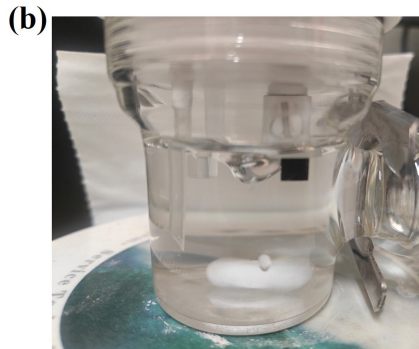

Supplement: d5nj00143a14.pdf [file d5nj00143a14.pdf]

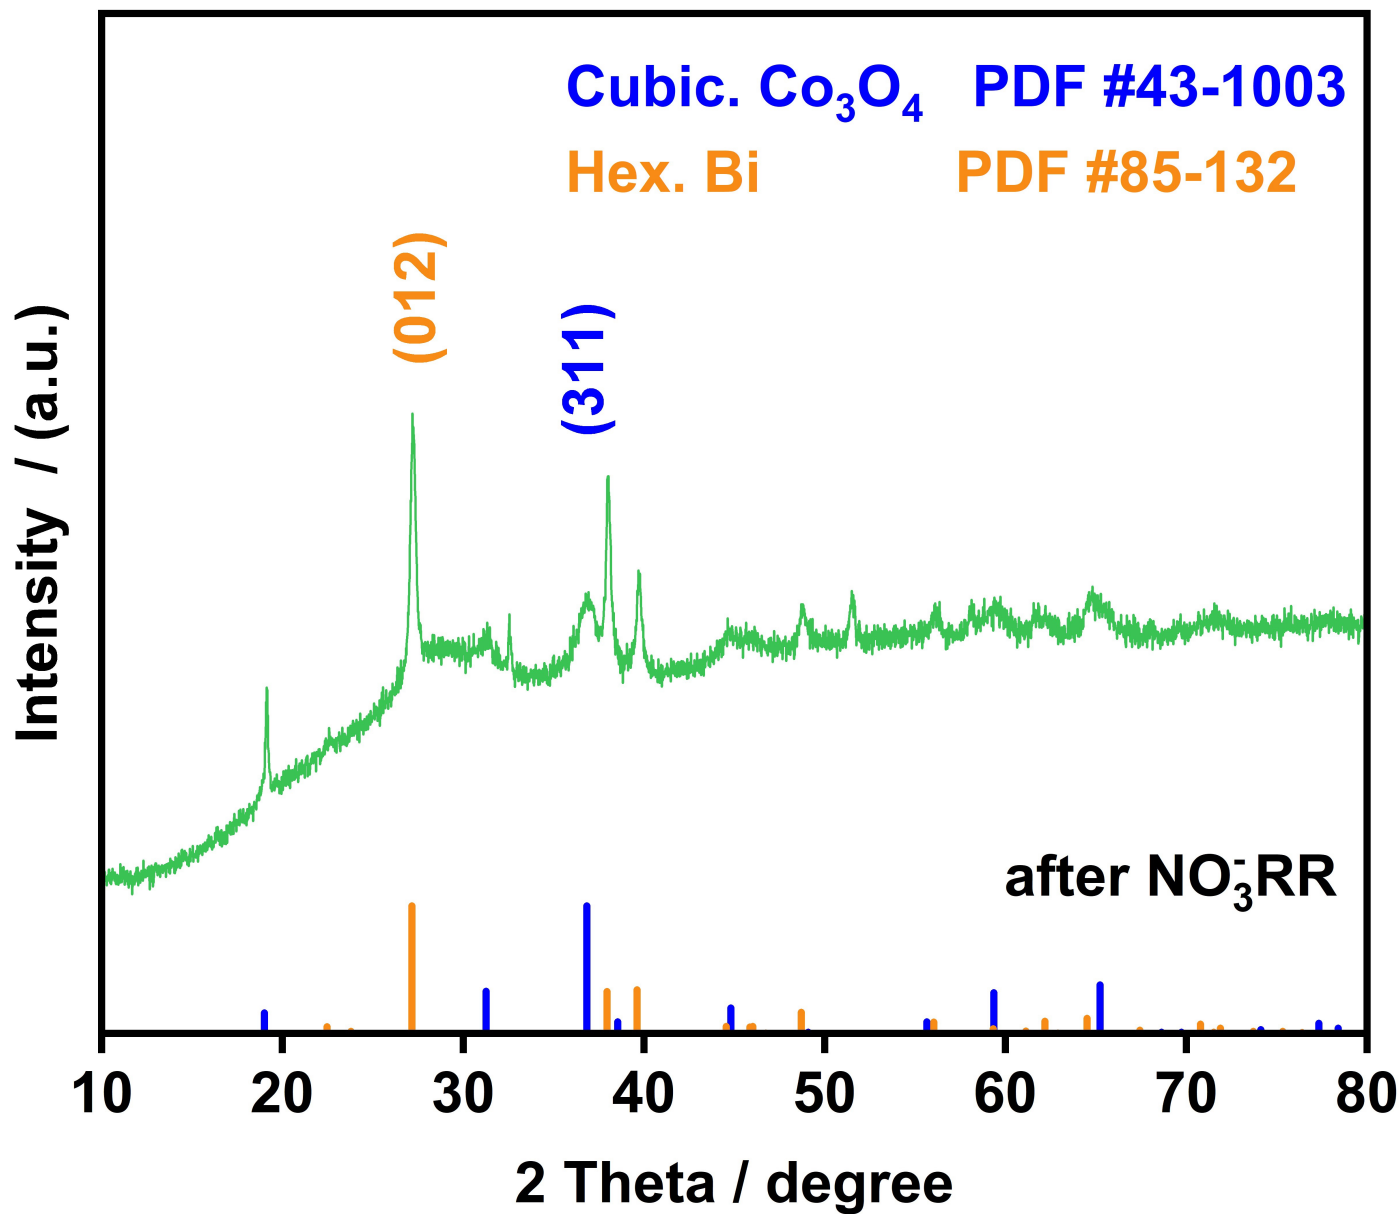

Supplement: d5nj00143a2.pdf [file d5nj00143a2.pdf]

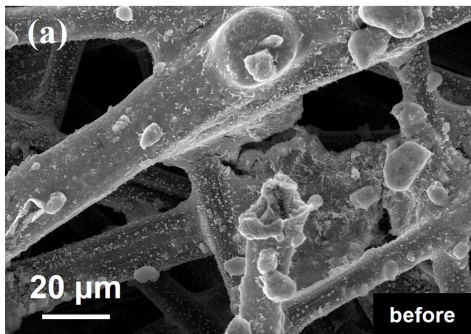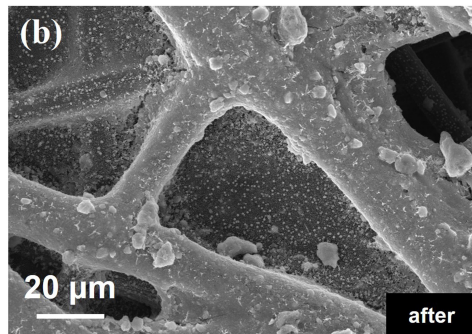

| Element | Atomic (%) | Wt (%) |
|---------|------------|--------|
| Co      | 39.37      | 39.40  |
| O       | 47.17      | 12.82  |
| Bi      | 13.46      | 47.78  |

| Element | Atomic (%) | Wt (%) |
|---------|------------|--------|
| Co      | 49.54      | 41.06  |
| O       | 32.93      | 7.41   |
| Bi      | 17.53      | 51.53  |

Supplement: d5nj00143a3.pdf [file d5nj00143a3.pdf]

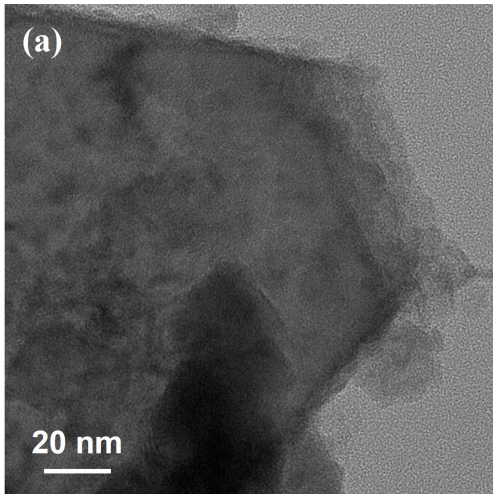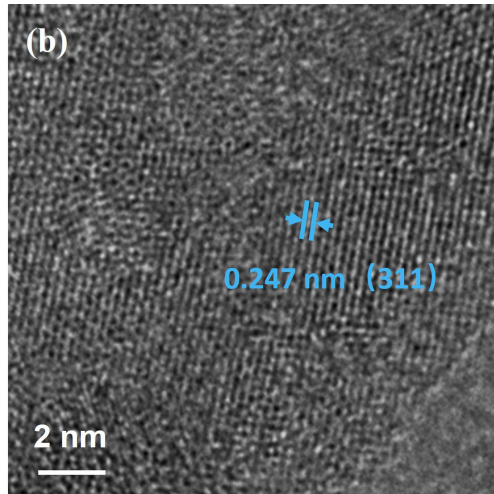

Supplement: d5nj00143a4.pdf [file d5nj00143a4.pdf]

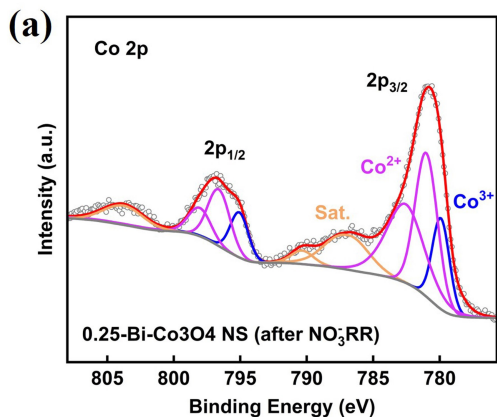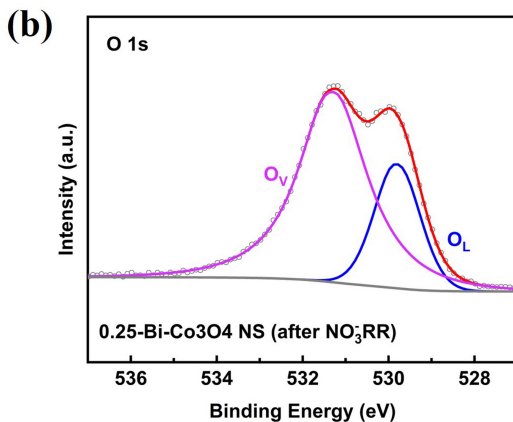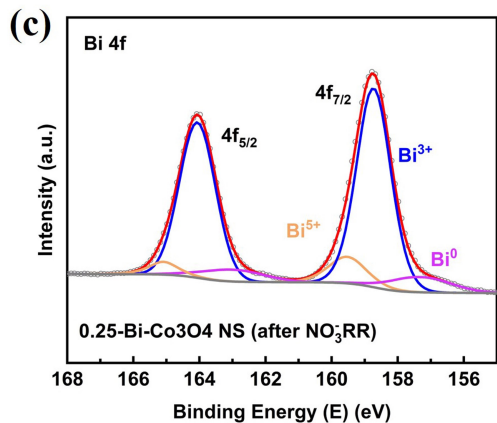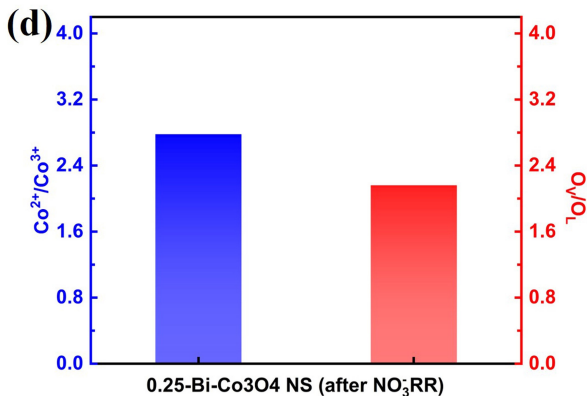

Supplement: d5nj00143a5.pdf [file d5nj00143a5.pdf]

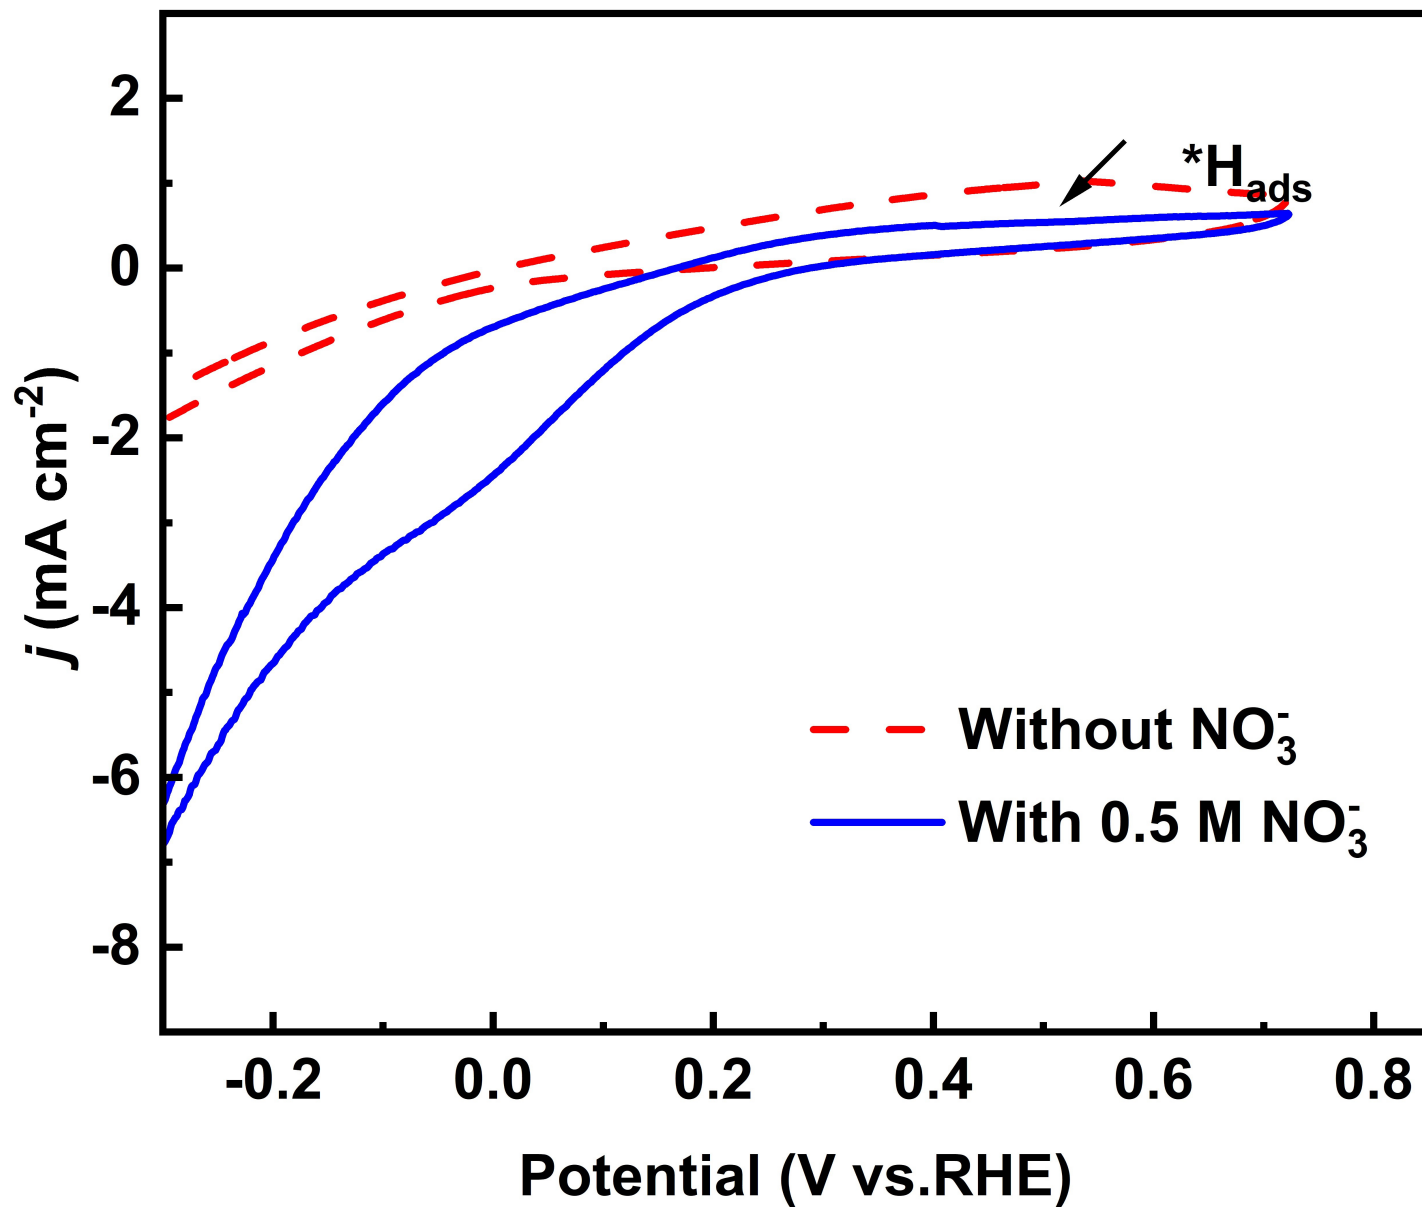

Supplement: d5nj00143a6.pdf [file d5nj00143a6.pdf]

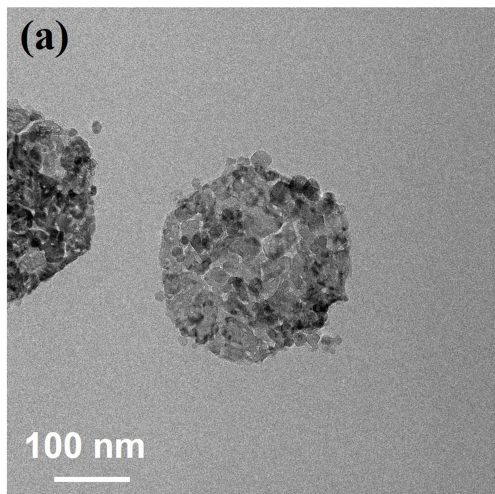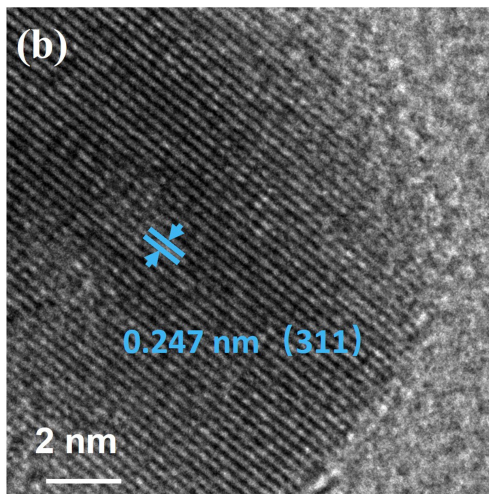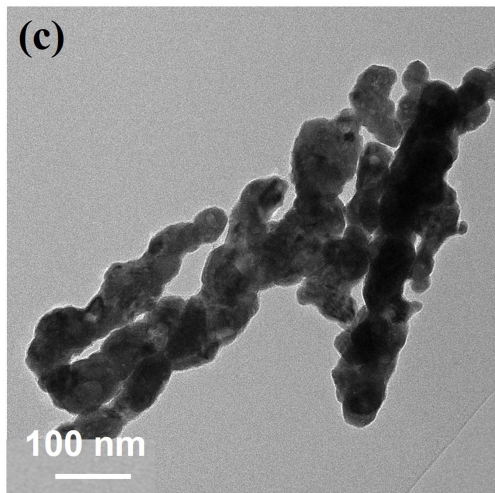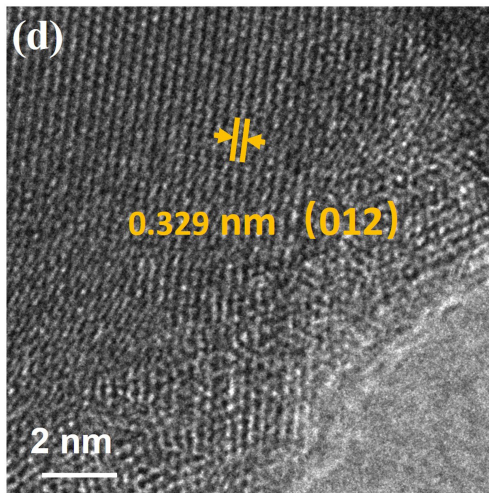

Supplement: d5nj00143a7.pdf [file d5nj00143a7.pdf]

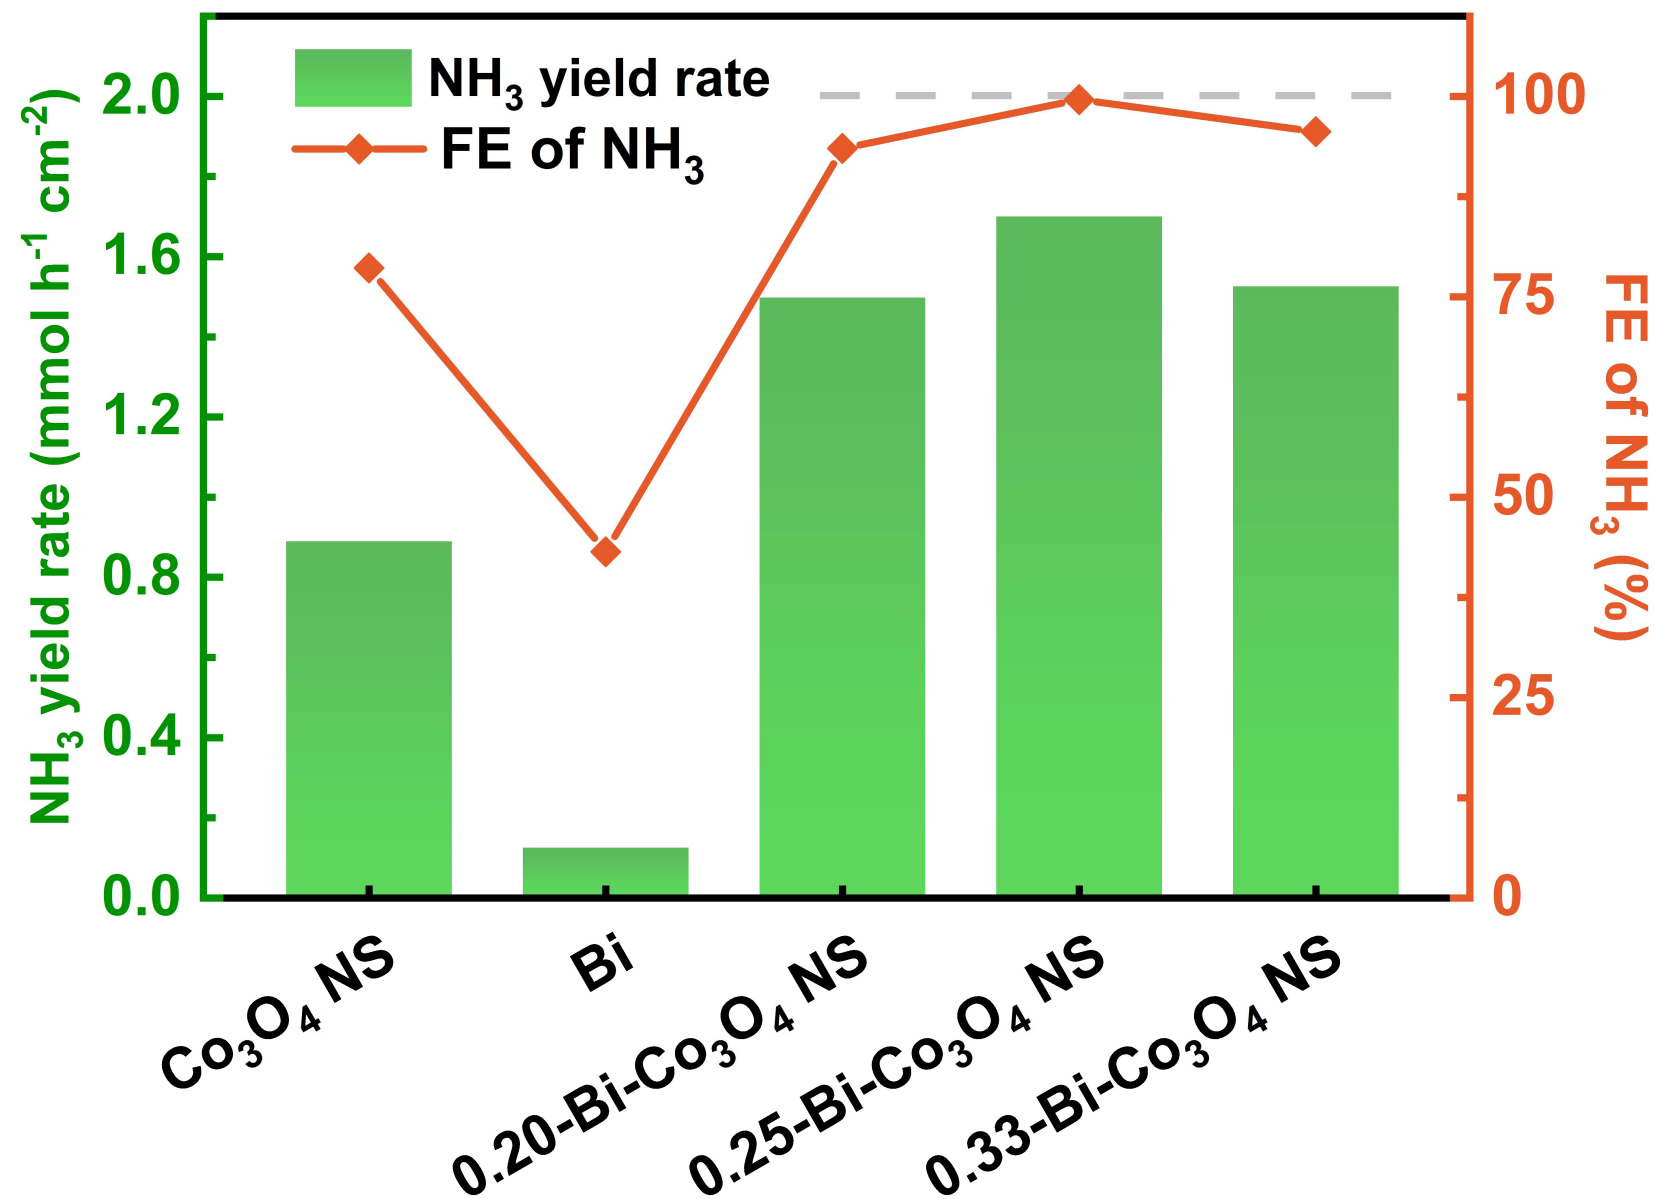

Supplement: d5nj00143a8.pdf [file d5nj00143a8.pdf]

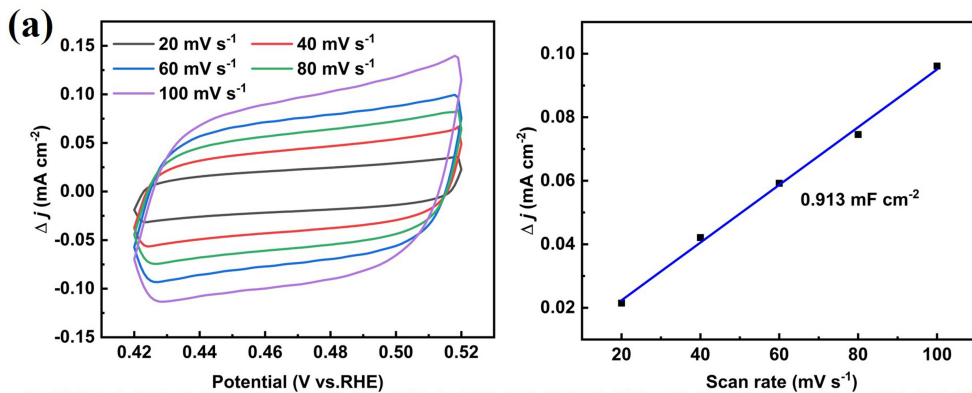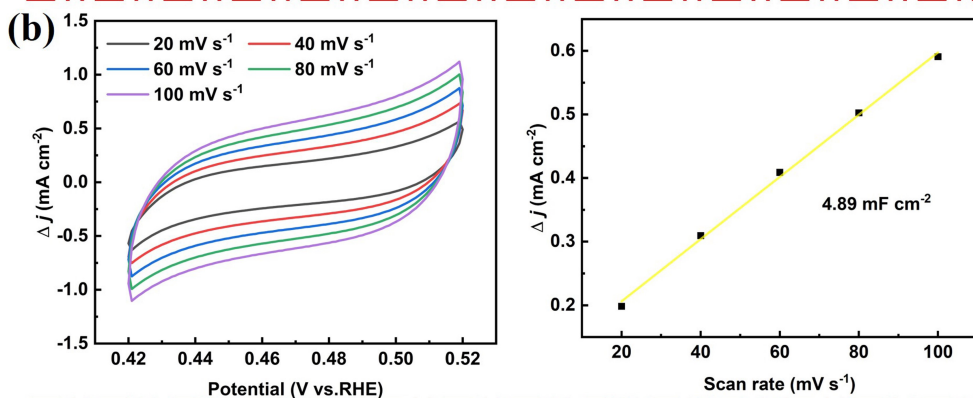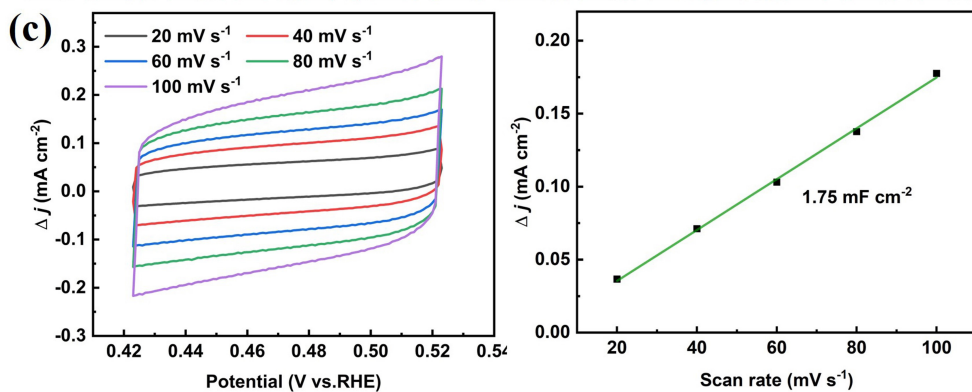

Supplement: d5nj00143a9.pdf [file d5nj00143a9.pdf]
